# Supplementary material for: Self-Consistent Implementation of Kohn–Sham Adiabatic Connection Models with Improved Treatment of the Strong-Interaction Limit
Source: PubMed Central journal article supplement (PMC9558377; doi:10.1021/acs.jctc.2c00352), 2022-09-12
Supplement: ct2c00352_si_001.pdf [file ct2c00352_si_001.pdf]

# Supporting information to “Self-Consistent Implementation of Kohn-Sham Adiabatic Connection Models with Improved Treatment of the Strong-Interaction Limit”

Szymon Śmiga<sup>a</sup>, Fabio Della Sala<sup>b,c</sup>, Paola Gori-Giorgi<sup>d</sup>, Eduardo Fabiano<sup>b,c</sup>

<sup>a</sup> *Institute of Physics, Faculty of Physics, Astronomy and Informatics,  
Nicolaus Copernicus University, Grudziadzka 5, 87-100 Torun, Poland*

<sup>b</sup> *Institute for Microelectronics and Microsystems (CNR-IMM),  
Via Monteroni, Campus Unisalento, 73100 Lecce, Italy*

<sup>c</sup> *Center for Biomolecular Nanotechnologies@UNILE, Istituto Italiano di Tecnologia (IIT),  
Via Barsanti, 73010 Arnesano (LE), Italy*

<sup>d</sup> *Department of Chemistry & Pharmaceutical Sciences and Amsterdam  
Institute of Molecular and Life Sciences (AIMMS), Faculty of Science, Vrije Universiteit,  
De Boelelaan 1083, 1081HV Amsterdam, The Netherlands,*

E-mail: szsmiga@fizyka.umk.pl

August 19, 2022

## Contents

|          |                                                          |          |
|----------|----------------------------------------------------------|----------|
| <b>1</b> | <b>Summary of the basis sets</b>                         | <b>2</b> |
| <b>2</b> | <b>Dissociation of H<sub>2</sub> with SPL functional</b> | <b>2</b> |
| <b>3</b> | <b>Hookes atom results</b>                               | <b>3</b> |

## 1 Summary of the basis sets

- **He, He<sub>2</sub>**: even tempered 20s10p2d basis.
- **Be, Ne, Ne<sub>2</sub>**: uncontracted ROOS-ATZP basis<sup>1</sup>.
- **Mg**: uncontracted aug-cc-pVTZ basis set<sup>2</sup>.
- **Ar**: *s* and *p* basis functions from the uncontracted ROOS-ATZP<sup>1</sup> basis set and *d* and *f* functions from the uncontracted aug-cc-pwCVQZ basis set<sup>3</sup>.
- **HF, CO, H<sub>2</sub>O, H<sub>2</sub>, Cl<sub>2</sub>, N<sub>2</sub>, HCl, NH<sub>3</sub>, C<sub>2</sub>H<sub>6</sub>**: uncontracted cc-pVTZ basis set of Dunning<sup>4</sup>.

## 2 Dissociation of H<sub>2</sub> with SPL functional

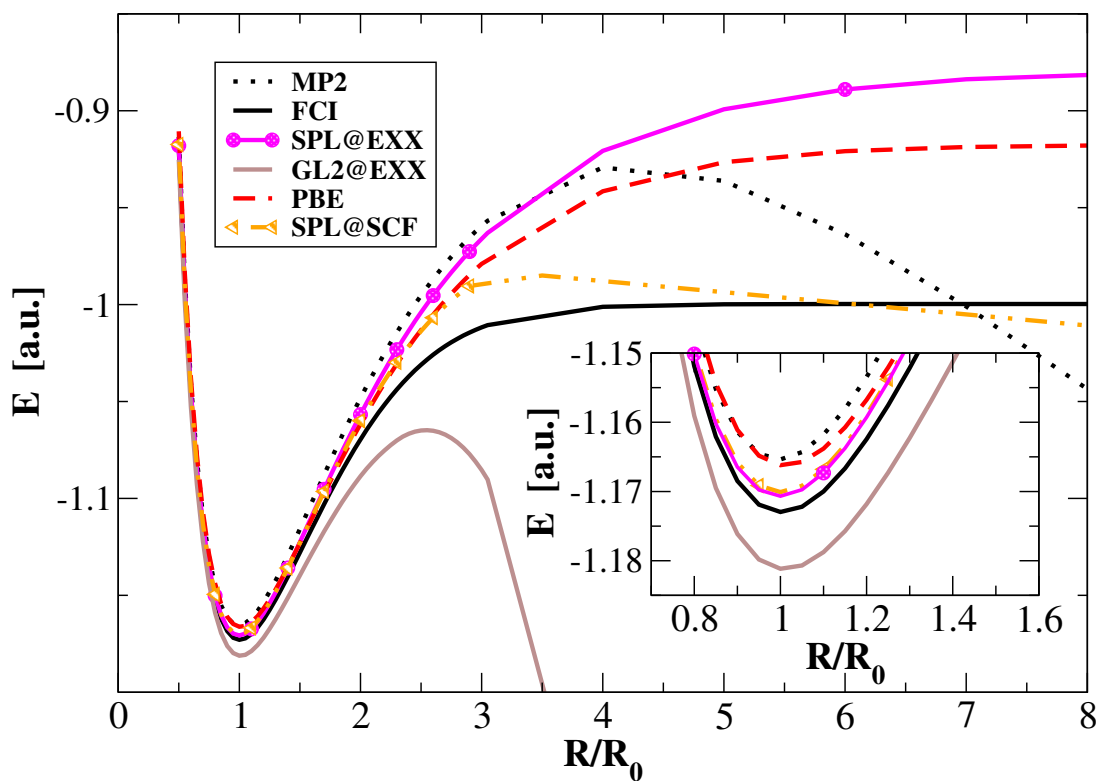

Figure S1: The total energy of the H<sub>2</sub> molecule as it is stretched calculated with the various methods. The inset presents the same data around the equilibrium distance.

### 3 Hookes atom results

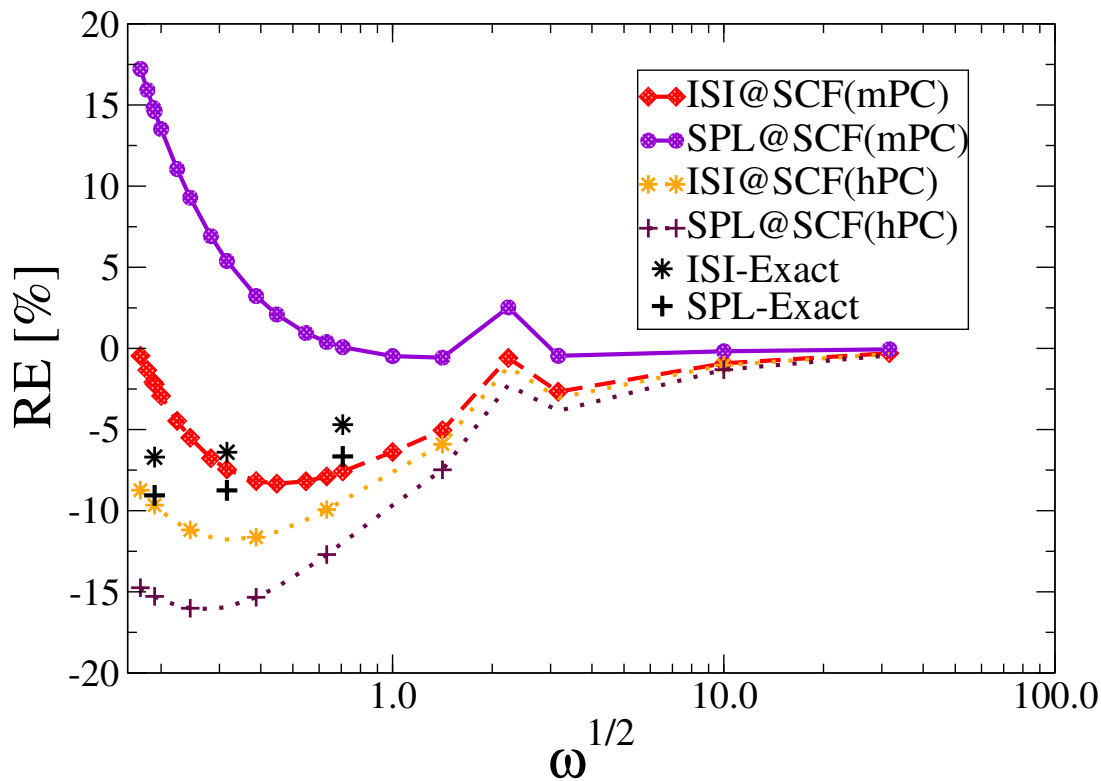

Figure S2: Relative error on correlation energies of harmonium atoms for various values of  $\omega$  computed at @SCF orbitals for ISI and SPL functionals using the hPC and mPC models for the strong-interaction functionals. The errors have been computed with respect FCI data obtained in the same basis set<sup>5</sup>. The exact ISI and SPL values are taken from Ref.<sup>6</sup>, and are obtained by inserting exact densities into the ISI and SPL functionals, including the exact treatment (SCE) of the strong-interaction limit.

## References

- [1] Per-Olof Widmark, Per-Åke Malmqvist, and Björn O Roos, “Density matrix averaged atomic natural orbital (ano) basis sets for correlated molecular wave functions”, *Theor. Chim. Acta* **77**(5), pp. 291–306 (1990).
- [2] D. E. Woon and T. H. Dunning, Jr., “Gaussian basis sets for use in correlated molecular calculations. III. The atoms aluminium through argon”, *J. Chem. Phys.* **98**, pp. 1358–1371 (1993).
- [3] K. A. Peterson and T. H. Dunning, Jr, *J. Chem. Phys.* **117**, pp. 10548 (2002).
- [4] Thom H. Dunning, “Gaussian basis sets for use in correlated molecular calculations. i. the atoms boron through neon and hydrogen”, *J. Chem. Phys.* **90**(2), pp. 1007–1023 (1989).
- [5] Eduard Matito, Jerzy Cioslowski, and Sergei F. Vyboishchikov, “Properties of harmonium atoms from fci calculations: Calibration and benchmarks for the ground state of the two-electron species”, *Phys. Chem. Chem. Phys.* **12**, pp. 6712–6716 (2010).
- [6] Derk P Kooi and Paola Gori-Giorgi, “Local and global interpolations along the adiabatic connection of dft: a study at different correlation regimes”, *Theor. Chem. Acc.* **137**(12), pp. 166 (2018).
